# Supplementary material for: A review of the AI2BIICIVDVI4 family as infrared nonlinear optical materials: the effect of each site on the structure and optical properties
Source: Royal Society of Chemistry journal article supplement (doi:10.1039/d0cc05132b), 2020-01-01
Supplement: d0cc05132b1.pdf [file d0cc05132b1.pdf]

## Supporting information

### **Review of the $A^I_2B^{II}C^{IV}D^{VI}_4$ Family as Infrared Nonlinear Optical Materials: The Effect of Each Site on the Structure and Optical Properties**

Guangmao Li,<sup>a</sup> Zhihua Yang<sup>a,b</sup>, Junjie Li<sup>\*a,b</sup> and Shilie Pan<sup>\*a,b</sup>

*†Key Laboratory of Functional Materials and Devices for Special Environments,  
Xinjiang Technical Institute of Physics & Chemistry, CAS; Xinjiang Key Laboratory  
of Electronic Information Materials and Devices; 40-1 South Beijing Road, Urumqi  
830011, China*

*To whom correspondence should be addressed:*

*E-mail:* [lijunjie@ms.xjb.ac.cn](mailto:lijunjie@ms.xjb.ac.cn) and [slpan@ms.xjb.ac.cn](mailto:slpan@ms.xjb.ac.cn)

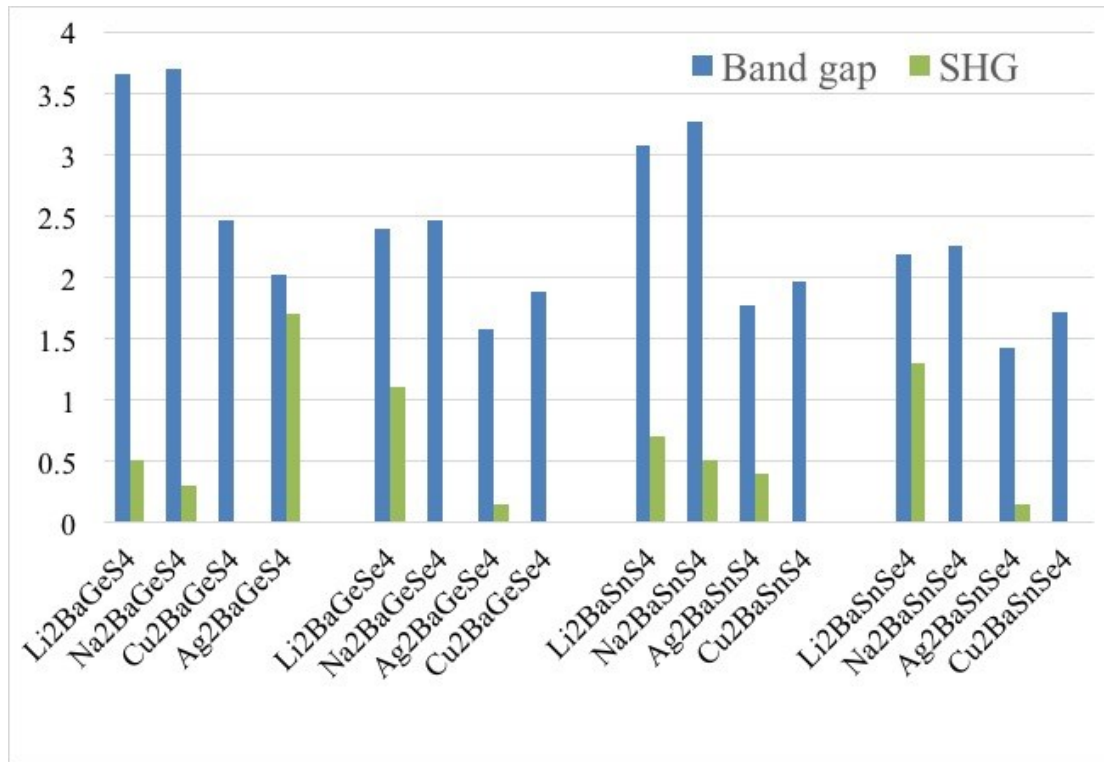

**Figure S1.** Histogram of properties (band gap and SHG response) comparisons among  $A_2BaGeS_4$ ,  $A_2BaGeSe_4$ ,  $A_2BaSnS_4$ , and  $A_2BaSnSe_4$  ( $A = Li, Na, Cu, Ag$ ).

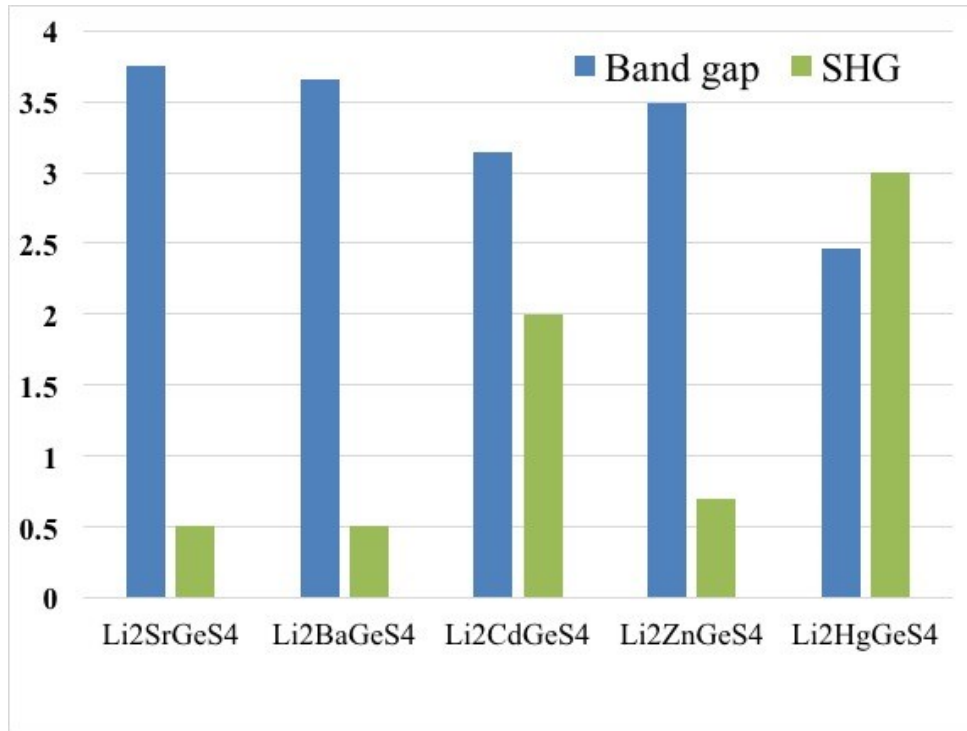

**Figure S2.** Histogram of properties (band gap and SHG response) comparisons among

Li<sub>2</sub>B<sup>II</sup>GeS<sub>4</sub> (B = Sr, Ba, Zn, Cd, Hg).

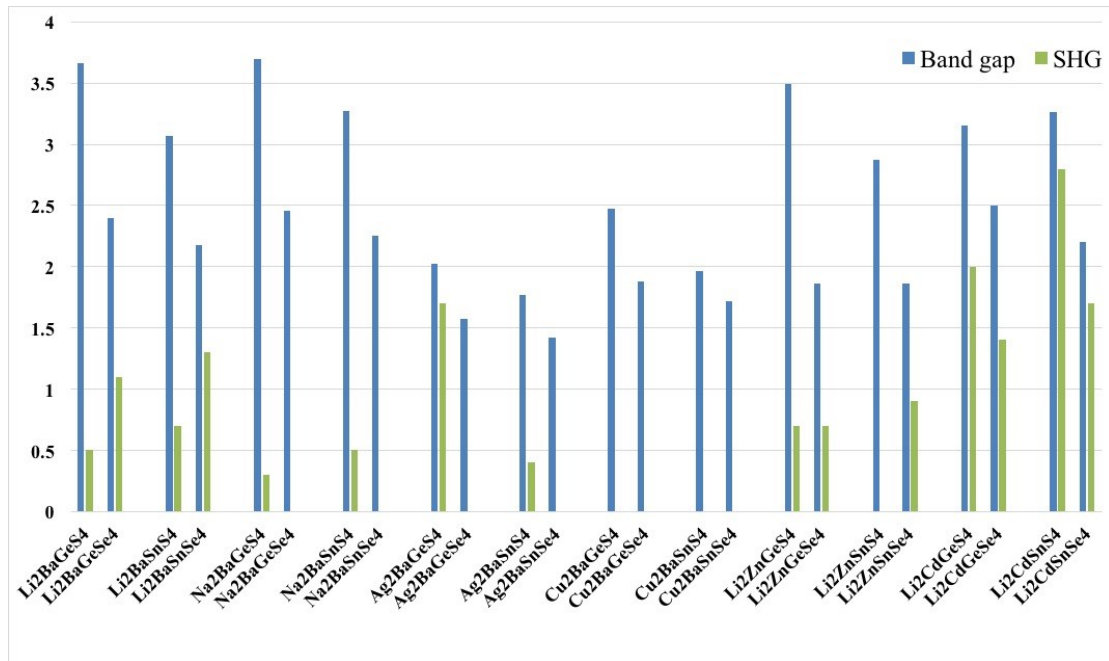

**Figure S3.** Histogram of properties (band gap and SHG response) comparisons among sulfides and relative selenides.
